# Supplementary material for: Effect of sawdust dosage and hydraulic retention time (HRT) on nitrate removal in sawdust/pyrite mixotrophic denitrification (SPMD) systems
Source: Royal Society of Chemistry journal article supplement (doi:10.1039/c8ew00748a), 2019-01-01
Supplement: c8ew00748a1.pdf [file c8ew00748a1.pdf]

## Supporting Information

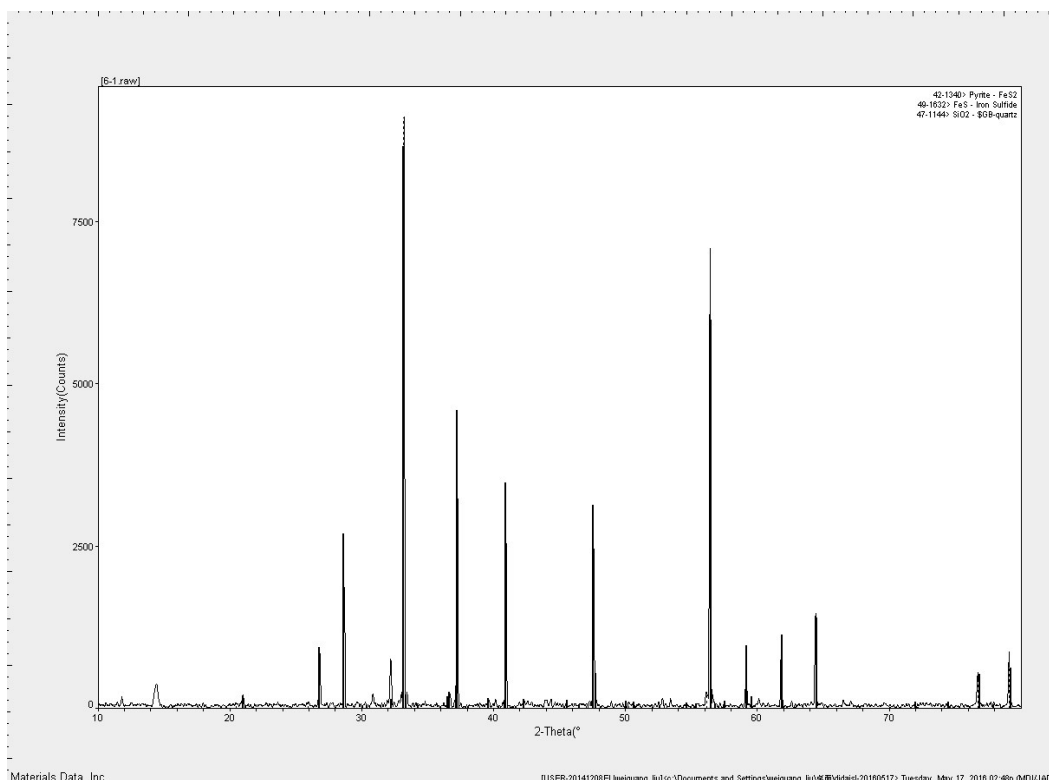

| [6-1.raw]                                                                                       |         |        |    |        |       |       |       |       |  | Peak Search Report |  |
|-------------------------------------------------------------------------------------------------|---------|--------|----|--------|-------|-------|-------|-------|--|--------------------|--|
| SCAN: 10.0/79.9983/0.01995/35.53(sec), Cu(40kV,40mA), I(max)=9123, 05-17-09 09:43               |         |        |    |        |       |       |       |       |  |                    |  |
| PEAK: 17-pts/Parabolic Filter, Threshold=3.0, Cutoff=1.5%, BG=3/1.0, Peak-Top=Summit            |         |        |    |        |       |       |       |       |  |                    |  |
| NOTE: Intensity = Counts, 2T(0)=0.0(°), Wavelength to Compute d-Spacing = 1.54056A(Cu/K-alpha1) |         |        |    |        |       |       |       |       |  |                    |  |
| #                                                                                               | 2-Theta | d(A)   | BG | Height | I%    | Area  | I%    | FWHM  |  |                    |  |
| 1                                                                                               | 20.453  | 4.3386 | 16 | 54     | 0.6   | 1483  | 2.8   | 0.466 |  |                    |  |
| 2                                                                                               | 25.964  | 3.4289 | 13 | 73     | 0.8   | 959   | 1.8   | 0.223 |  |                    |  |
| 3                                                                                               | 28.657  | 3.1124 | 11 | 1848   | 20.3  | 11635 | 22.2  | 0.107 |  |                    |  |
| 4                                                                                               | 33.188  | 2.6972 | 23 | 9100   | 100.0 | 52453 | 100.0 | 0.098 |  |                    |  |
| 5                                                                                               | 37.219  | 2.4138 | 15 | 3606   | 39.6  | 20614 | 39.3  | 0.097 |  |                    |  |
| 6                                                                                               | 38.935  | 2.3113 | 18 | 51     | 0.6   | 827   | 1.6   | 0.275 |  |                    |  |
| 7                                                                                               | 40.909  | 2.2042 | 65 | 3048   | 33.5  | 16615 | 31.7  | 0.092 |  |                    |  |
| 8                                                                                               | 47.034  | 1.9304 | 30 | 34     | 0.4   | 1126  | 2.1   | 0.562 |  |                    |  |
| 9                                                                                               | 47.572  | 1.9099 | 8  | 2612   | 28.7  | 15847 | 30.2  | 0.103 |  |                    |  |
| 10                                                                                              | 50.230  | 1.8148 | 17 | 74     | 0.8   | 1292  | 2.5   | 0.296 |  |                    |  |
| 11                                                                                              | 56.133  | 1.6372 | 14 | 224    | 2.5   | 4954  | 9.4   | 0.375 |  |                    |  |
| 12                                                                                              | 56.412  | 1.6297 | 8  | 7083   | 77.8  | 44372 | 84.6  | 0.106 |  |                    |  |
| 13                                                                                              | 59.146  | 1.5607 | 13 | 669    | 7.4   | 4682  | 8.9   | 0.119 |  |                    |  |
| 14                                                                                              | 61.818  | 1.4996 | 11 | 1008   | 11.1  | 6601  | 12.6  | 0.111 |  |                    |  |
| 15                                                                                              | 64.413  | 1.4452 | 23 | 1426   | 15.7  | 9875  | 18.8  | 0.117 |  |                    |  |
| 16                                                                                              | 76.725  | 1.2411 | 11 | 528    | 5.8   | 5112  | 9.7   | 0.164 |  |                    |  |
| 17                                                                                              | 79.082  | 1.2099 | 7  | 856    | 9.4   | 7018  | 13.4  | 0.139 |  |                    |  |

**S1: X-ray diffraction characterization of pyrite**

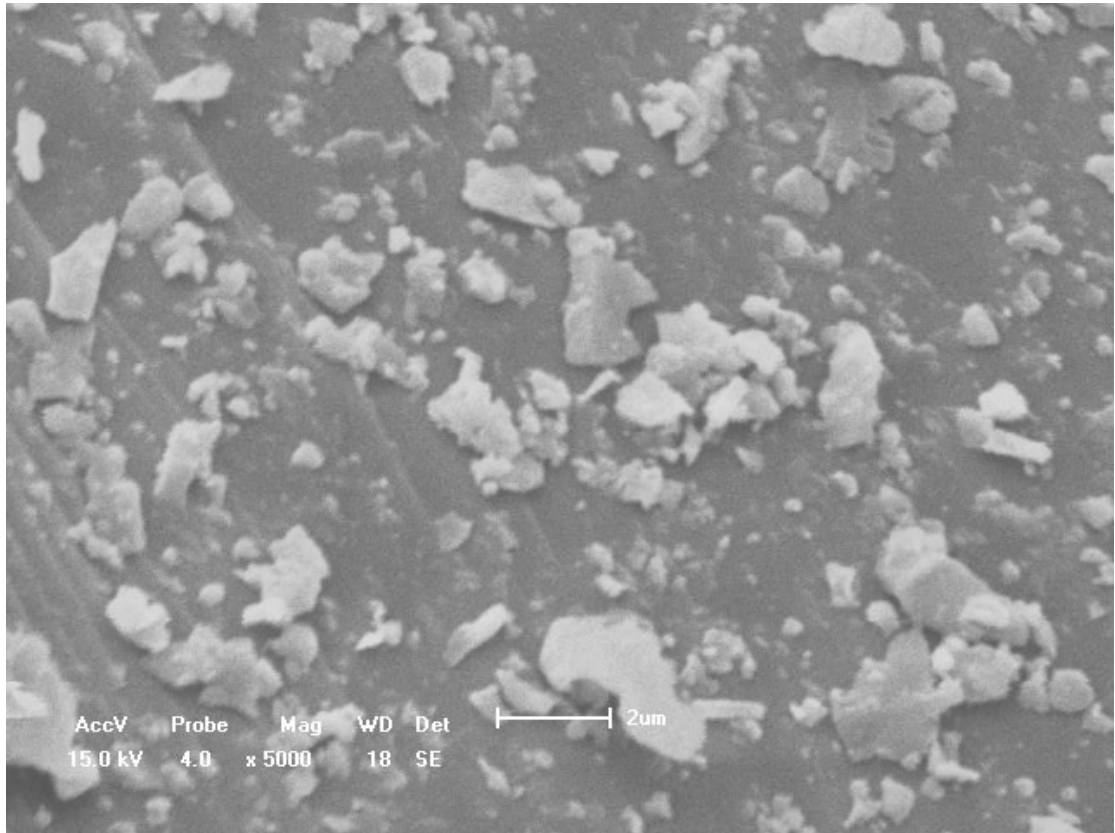

**S2: Scanning electron micrograph of the pyrite**

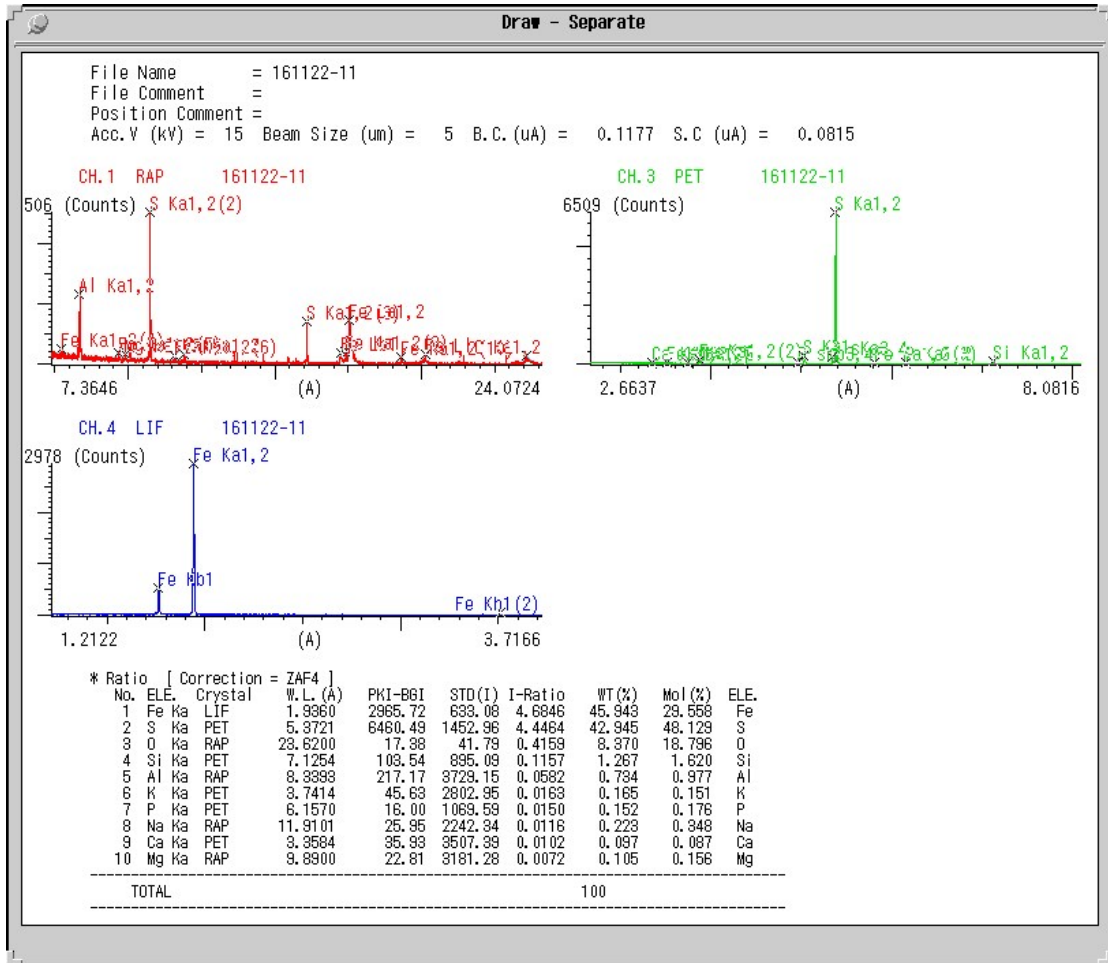

**S3: Electron probe microanalysis report of pyrite**
